# Supplementary material for: The Endoplasmic Reticulum Stress Sensor Inositol-Requiring Enzyme 1α Augments Bacterial Killing through Sustained Oxidant Production
Source: PubMed Central journal article supplement — mBio. 2015 Jul 14;6(4):e00705-15. doi: 10.1128/mBio.00705-15 (PMC4502229; doi:10.1128/mbio.00705-15), 2015-07-14
Supplement: mbo003152390sf1.pdf [file mbo003152390sf1.pdf]

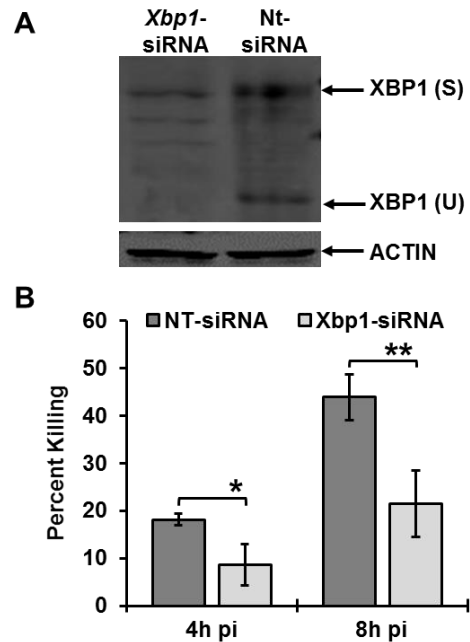

**FIG S1 XBP1 enhances MRSA killing by macrophages. (A)** XBP1 and ACTIN immunoblots of cell lysate from transiently transfected RAW264.7 cells with NT control or *Xbp1* siRNA, which were infected with MRSA for 8h. **(B)** Percent of MRSA killing by RAW264.7 macrophages when transfected with NT-control or *Xbp1* siRNA. Percent killing is presented as mean of  $n \geq 3$  independent experiments  $\pm$  SD. \* $p < 0.05$ , \*\* $P < 0.01$ .
