# Supplementary material for: The Endoplasmic Reticulum Stress Sensor Inositol-Requiring Enzyme 1α Augments Bacterial Killing through Sustained Oxidant Production
Source: PubMed Central journal article supplement — mBio. 2015 Jul 14;6(4):e00705-15. doi: 10.1128/mBio.00705-15 (PMC4502229; doi:10.1128/mbio.00705-15), 2015-07-14
Supplement: mbo003152390sf2.pdf [file mbo003152390sf2.pdf]

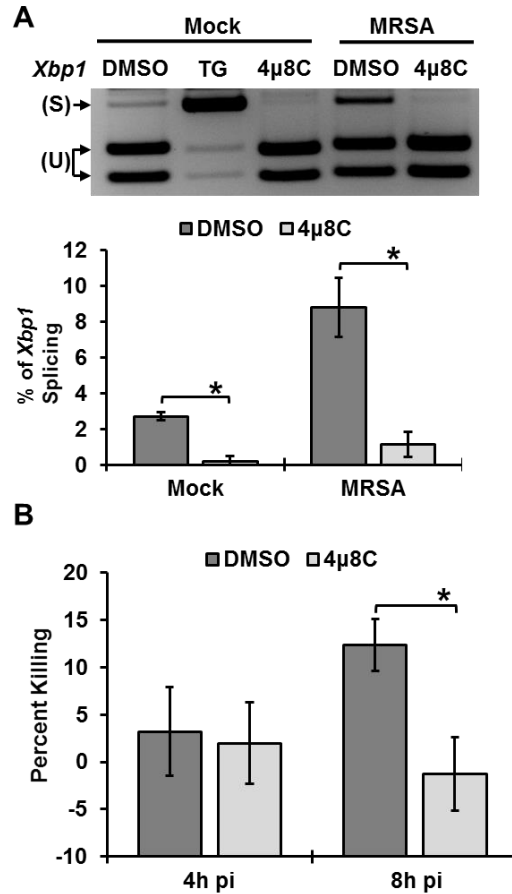

**FIG S2 IRE1 is activated by human macrophages and enhances MRSA killing. (A)**

RT-PCR analysis of *Xbp1* mRNA splicing in differentiated THP-1 cells when left untreated (Mock), treated with 5  $\mu$ M thapsigargin (TG), treated with 25  $\mu$ M 4 $\mu$ 8C, or infected with MRSA for 8h (MOI 20) in the presence of DMSO or 4 $\mu$ 8C. RT-PCR image (top) is representative of  $n \geq 3$  independent experiments and % *Xbp1* spliced (bottom) was calculated based on band densitometry using the following formula; [ $Xbp1s / (Xbp1s + Xbp1u)$ ]. **(B)** Percent of MRSA killing by differentiated THP-1 cells in the presence of DMSO or 4 $\mu$ 8C. Graph is represented by mean of  $n \geq 3$  independent experiments  $\pm$  SD.

\* $p < 0.05$ .
