# Supplementary material for: The Endoplasmic Reticulum Stress Sensor Inositol-Requiring Enzyme 1α Augments Bacterial Killing through Sustained Oxidant Production
Source: PubMed Central journal article supplement — mBio. 2015 Jul 14;6(4):e00705-15. doi: 10.1128/mBio.00705-15 (PMC4502229; doi:10.1128/mbio.00705-15), 2015-07-14
Supplement: mbo003152390sf3.pdf [file mbo003152390sf3.pdf]

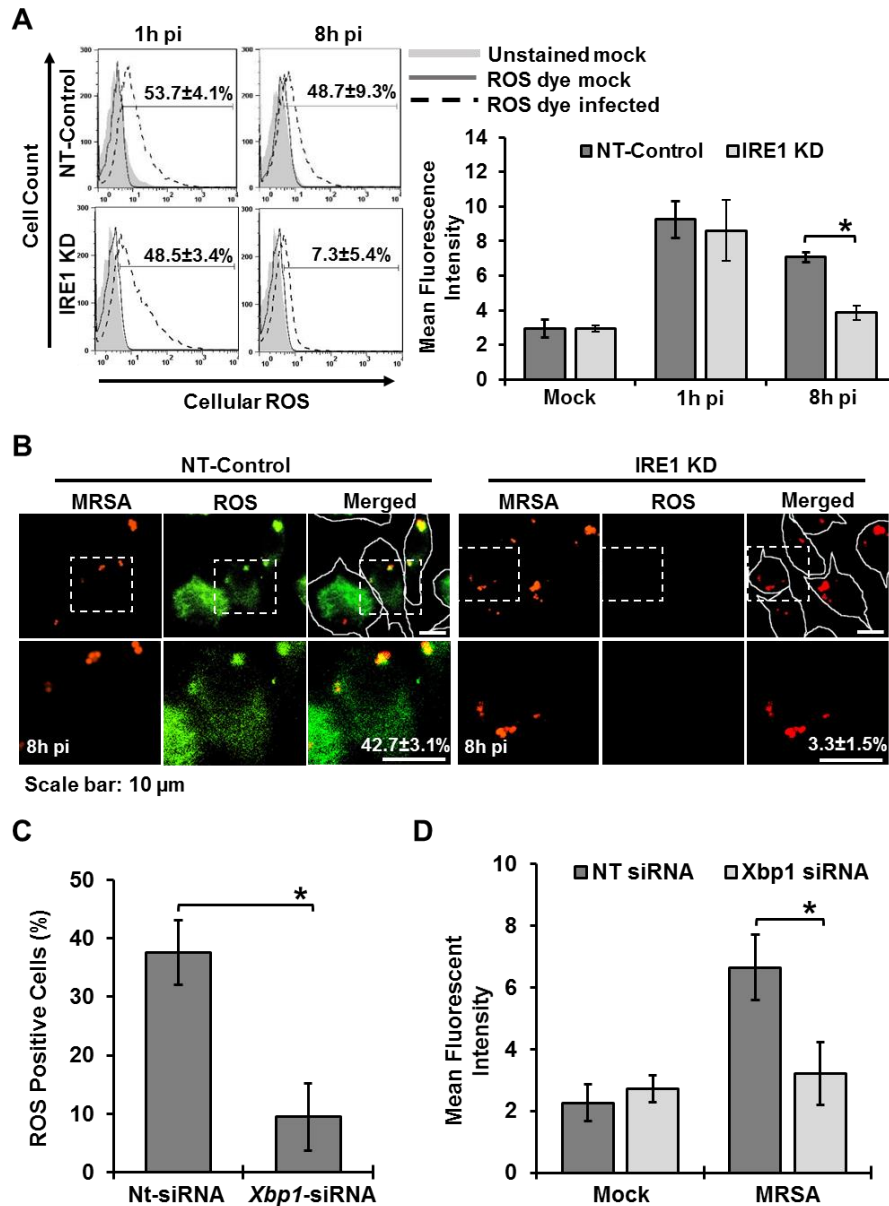

**FIG S3 IRE1 KD prevents sustained ROS production by macrophages. (A)** Total cellular ROS production in live cells as assessed by flow cytometry using CM-H2DCFDA. The percentage of ROS<sup>+</sup> cells were determined by gating against stained mock infected cells. Representative histograms are shown (left) with the mean percentage of ROS<sup>+</sup> cells from n≥3 independent experiments +/- SD. Mean fluorescent intensity (right) for the indicated conditions was calculated as geometric mean from n≥3 independent

experiments +/- SD. **(B)** Live-cell fluorescence images of ROS association with MRSA-containing phagosomes. RAW264.7 macrophage cell lines expressing NT-control or IRE1 shRNA were infected with MRSA-mCherry (MOI 20) and stained with ROS fluorescence indicator, CM-H2DCFDA (Green), at 8h pi. The percent of cells with ROS<sup>+</sup> phagosome were determined by counting cells with at least one enriched ROS area localized with MRSA from at least 100 ROS<sup>+</sup> infected cells. Representative images are shown with the mean percent of cells with ROS<sup>+</sup> phagosome from n≥3 independent experiments +/- SD. **(C)** Percent of ROS<sup>+</sup> cells was quantified by flow cytometry from NT-control, or XBP1 KD macrophages at 8h pi. The percentage of ROS<sup>+</sup> cells are measured by gating against a stained mock cells. **(D)** Mean fluorescent intensity (MFI) was measured from NT-control, or XBP1 KD macrophages. The cells were either left untreated (mock) or infected with MRSA for 8h. MFI was analyzed as geometric mean using FlowJo software. **(C-D)** Graphs are presented as mean of n≥3 independent experiments +/- SD. \*p < 0.05.
